# Supplementary material
Source: PubMed Central journal article supplement (PMC6545142)
Supplement: NIHMS1521086-supplement-1.pdf [file NIHMS1521086-supplement-1.pdf]

**Supplemental Table 1.** Spearman correlations between adherence to several healthy dietary pattern scores and the Pro-Fertility Diet Index (n=375 unique FFQs).

|                       | <b>Pro-Fertility</b> | <b>MedDiet</b> | <b>AHEI2010</b> | <b>Fertility Diet</b> |
|-----------------------|----------------------|----------------|-----------------|-----------------------|
| <b>Pro-Fertility</b>  | 1.0                  | 0.34           | 0.29            | 0.38                  |
| <b>MedDiet</b>        |                      | 1.0            | 0.61            | 0.33                  |
| <b>aHEI2010</b>       |                      |                | 1.0             | 0.45                  |
| <b>Fertility Diet</b> |                      |                |                 | 1.0                   |

**Mediterranean Diet (MedDiet):** based on dietary intake of 11 items: vegetables, potatoes, legumes, fruits, whole grains, red meat, fish, poultry, alcohol, full fat dairy, olive oil. Range: 0 to 55.

**Alternate Healthy Eating Index (aHEI2010):** based on dietary intake of 11 items: vegetables (excluding potatoes), fruit, whole grains, nuts and legumes, long-chain omega 3 fats, polyunsaturated fat, alcohol, sugar-sweetened beverages and fruit juice, red and processed meat, trans fat, and sodium. Range: 0 to 110.

**Fertility Diet:** based on dietary intake of 8 items: ratio of MUFA to TFA, % of energy from vegetable protein, % energy from animal protein, high-fat dairy, iron, multivitamins, glycemic load, and low-fat dairy. Range: 8 to 40.

**Supplemental Table 2.** Baseline characteristics of 357 women (375 unique FFQs) by quartile of pre-treatment adherence to the Mediterranean Diet in the EARTH Study.

| Quartile (Range)                                  | Mediterranean Diet (MedDiet) |            |            |            | p-value <sup>1</sup> |
|---------------------------------------------------|------------------------------|------------|------------|------------|----------------------|
|                                                   | Q1 (17-28)                   | Q2 (29-31) | Q3 (32-33) | Q4 (34-44) |                      |
| Number of Women/FFQs                              | 90/92                        | 93/100     | 74/76      | 100/107    |                      |
| <b>Personal Characteristics</b>                   |                              |            |            |            |                      |
| Age, years                                        | 35.7 (3.8)                   | 34.9 (4.5) | 35.2 (3.8) | 35.5 (4.0) | 0.29                 |
| Ever smoker, n (%)                                | 31 (33.7)                    | 24 (24.0)  | 16 (21.1)  | 29 (27.1)  | 0.27                 |
| White, n (%)                                      | 73 (79.4)                    | 87 (87.0)  | 63 (82.9)  | 91 (85.1)  | 0.52                 |
| Education, n (%)                                  |                              |            |            |            | 0.71                 |
| High school or less                               | 8 (8.7)                      | 7 (7.0)    | 8 (10.5)   | 6 (5.6)    |                      |
| College                                           | 31 (24.0)                    | 39 (39.0)  | 21 (27.6)  | 38 (35.5)  |                      |
| Graduate school                                   | 53 (57.6)                    | 54 (54.0)  | 47 (61.8)  | 63 (58.9)  |                      |
| BMI, kg/m <sup>2</sup>                            | 24.2 (3.8)                   | 24.8 (4.7) | 24.3 (4.5) | 23.2 (3.9) | 0.02                 |
| Moderate to vigorous exercise, hrs/wk             | 2.8 (3.4)                    | 4.0 (4.3)  | 4.1 (4.1)  | 4.7 (4.9)  | 0.005                |
| <b>Baseline Cycle Characteristics</b>             |                              |            |            |            |                      |
| Infertility diagnosis, n (%)                      |                              |            |            |            | 0.49                 |
| Female factor                                     | 30 (32.6)                    | 36 (36.0)  | 22 (29.0)  | 29 (27.1)  |                      |
| Male factor                                       | 32 (34.8)                    | 27 (27.0)  | 19 (25.0)  | 33 (30.8)  |                      |
| Unexplained                                       | 30 (32.6)                    | 37 (37.0)  | 35 (46.1)  | 45 (42.1)  |                      |
| Treatment protocol, n (%)                         |                              |            |            |            | 0.32                 |
| Antagonist                                        | 16 (17.4)                    | 6 (6.0)    | 14 (18.4)  | 12 (11.2)  |                      |
| Flare                                             | 12 (13.0)                    | 12 (12.0)  | 7 (9.2)    | 10 (9.4)   |                      |
| Luteal phase agonist                              | 54 (58.7)                    | 72 (72.0)  | 49 (64.5)  | 76 (71.0)  |                      |
| Egg Donor or Cryo Cycle                           | 10 (10.9)                    | 10 (10.0)  | 6 (7.9)    | 9 (8.4)    |                      |
| Day 3 FSH, IU/L                                   | 7.3 (1.7)                    | 7.4 (3.1)  | 7.3 (2.2)  | 7.4 (2.8)  | 0.69                 |
| Embryo Transfer Day, n (%) <sup>2</sup>           |                              |            |            |            | 0.66                 |
| Day 2                                             | 4 (5.7)                      | 3 (3.9)    | 2 (3.0)    | 7 (8.2)    |                      |
| Day 3                                             | 31 (44.3)                    | 38 (48.7)  | 37 (56.1)  | 39 (45.9)  |                      |
| Day 5                                             | 35 (50.0)                    | 37 (47.4)  | 27 (40.9)  | 39 (45.9)  |                      |
| Number of Embryos Transferred, n (%) <sup>2</sup> |                              |            |            |            | 0.29                 |
| 1 embryo                                          | 19 (27.1)                    | 13 (16.9)  | 17 (25.8)  | 26 (30.6)  |                      |
| 2 embryos                                         | 39 (55.7)                    | 52 (67.5)  | 33 (50.0)  | 45 (52.9)  |                      |
| 3+ embryos                                        | 12 (17.1)                    | 12 (15.6)  | 16 (24.2)  | 14 (16.5)  |                      |
| <b>Dietary Characteristics</b>                    |                              |            |            |            |                      |
| Total Calories, kcal/day                          | 1602 (551)                   | 1725 (542) | 1799 (564) | 2030 (628) | <0.001               |
| Carbohydrates, % of kcal/day                      | 47.6 (8.8)                   | 47.5 (6.7) | 50.9 (7.7) | 50.3 (7.4) | <0.001               |
| Protein, % of kcal/day                            | 16.9 (3.2)                   | 17.0 (2.7) | 16.9 (2.7) | 16.2 (2.5) | 0.07                 |
| Fat, % of kcal/day                                | 33.7 (6.8)                   | 33.8 (5.5) | 30.8 (6.0) | 33.0 (6.9) | <0.001               |
| Alcohol, g/day                                    | 7.6 (12.7)                   | 9.0 (9.9)  | 9.4 (8.9)  | 9.1 (9.7)  | 0.003                |
| Caffeine, mg/day                                  | 143 (126)                    | 119 (101)  | 122 (108)  | 127 (98)   | 0.74                 |
| Multivitamin Use, n (%)                           | 76 (82.6)                    | 87 (88.8)  | 66 (88.0)  | 12 (88.8)  | 0.53                 |
| Duration of Use ≥2 years                          | 55 (72.4)                    | 66 (75.9)  | 48 (72.7)  | 67 (70.5)  | 0.88                 |

Abbreviations: FFQ; food frequency questionnaire; Q, quartile.

<sup>1</sup>P-values were calculated using a Kruskal-Wallis test for continuous variables and a chi-square test for categorical variables.

<sup>2</sup>Embryo transfer day and number were only assessed among fresh cycles with embryo transfer.

**Supplemental Table 3.** Baseline characteristics of 357 women (375 unique FFQs) by quartile of pre-treatment adherence to the Alternate Healthy Eating Index 2010 in the EARTH Study.

| Quartile (Range)                                  | Alternate Healthy Eating Index 2010 |            |            |            | p-value <sup>1</sup> |
|---------------------------------------------------|-------------------------------------|------------|------------|------------|----------------------|
|                                                   | Q1 (32-60)                          | Q2 (61-67) | Q3 (68-74) | Q4 (75-99) |                      |
| Number of Women/FFQs                              | 92/95                               | 87/89      | 88/92      | 90/99      |                      |
| <b>Personal Characteristics</b>                   |                                     |            |            |            |                      |
| Age, years                                        | 35.1 (4.1)                          | 35.2 (4.3) | 35.5 (4.2) | 35.5 (3.5) | 0.65                 |
| Ever smoker, n (%)                                | 30 (31.6)                           | 21 (23.6)  | 22 (23.9)  | 27 (27.3)  | 0.58                 |
| White, n (%)                                      | 79 (83.2)                           | 72 (82.0)  | 77 (83.7)  | 85 (85.9)  | 0.91                 |
| Education, n (%)                                  |                                     |            |            |            | 0.19                 |
| High school or less                               | 13 (13.7)                           | 4 (4.5)    | 5 (5.4)    | 7 (7.1)    |                      |
| College                                           | 32 (33.7)                           | 34 (38.2)  | 27 (29.4)  | 36 (36.4)  |                      |
| Graduate school                                   | 50 (52.6)                           | 51 (57.3)  | 60 (65.2)  | 56 (56.6)  |                      |
| BMI, kg/m <sup>2</sup>                            | 24.1 (4.1)                          | 24.5 (4.2) | 24.1 (4.7) | 23.7 (4.1) | 0.42                 |
| Moderate to vigorous exercise, hrs/wk             | 2.8 (3.6)                           | 4.1 (4.1)  | 3.8 (4.4)  | 4.9 (4.8)  | 0.001                |
| <b>Baseline Cycle Characteristics</b>             |                                     |            |            |            |                      |
| Infertility diagnosis, n (%)                      |                                     |            |            |            | 0.26                 |
| Female factor                                     | 31 (32.6)                           | 31 (34.8)  | 30 (32.6)  | 25 (25.3)  |                      |
| Male factor                                       | 32 (33.7)                           | 27 (30.3)  | 28 (30.4)  | 24 (24.2)  |                      |
| Unexplained                                       | 32 (33.7)                           | 31 (34.8)  | 34 (37.0)  | 50 (50.5)  |                      |
| Treatment protocol, n (%)                         |                                     |            |            |            | 0.10                 |
| Antagonist                                        | 9 (9.5)                             | 10 (11.2)  | 11 (12.0)  | 18 (18.2)  |                      |
| Flare                                             | 7 (7.4)                             | 9 (10.1)   | 17 (18.5)  | 8 (8.1)    |                      |
| Luteal phase agonist                              | 68 (71.6)                           | 62 (69.7)  | 53 (57.6)  | 68 (68.7)  |                      |
| Egg Donor or Cryo Cycle                           | 11 (11.6)                           | 8 (9.0)    | 11 (12.0)  | 5 (5.1)    |                      |
| Day 3 FSH, IU/L                                   | 7.1 (2.4)                           | 7.3 (1.9)  | 7.7 (3.3)  | 7.2 (2.3)  | 0.87                 |
| Embryo Transfer Day, n (%) <sup>2</sup>           |                                     |            |            |            | 0.14                 |
| Day 2                                             | 4 (5.3)                             | 2 (2.8)    | 3 (4.4)    | 7 (8.5)    |                      |
| Day 3                                             | 32 (42.1)                           | 31 (43.1)  | 42 (60.9)  | 40 (48.8)  |                      |
| Day 5                                             | 40 (52.6)                           | 39 (54.2)  | 24 (34.8)  | 35 (42.7)  |                      |
| Number of Embryos Transferred, n (%) <sup>2</sup> |                                     |            |            |            | 0.45                 |
| 1 embryo                                          | 17 (22.4)                           | 23 (31.9)  | 14 (20.6)  | 21 (25.6)  |                      |
| 2 embryos                                         | 49 (64.5)                           | 34 (47.2)  | 41 (60.3)  | 45 (54.9)  |                      |
| 3+ embryos                                        | 10 (13.2)                           | 15 (20.8)  | 13 (19.1)  | 16 (19.5)  |                      |
| <b>Dietary Characteristics</b>                    |                                     |            |            |            |                      |
| Total Calories, kcal/day                          | 1675 (539)                          | 1779 (609) | 1853 (673) | 1878 (541) | 0.09                 |
| Carbohydrates, % of kcal/day                      | 49.8 (7.9)                          | 49.6 (7.1) | 50.0 (6.8) | 46.8 (8.6) | 0.04                 |
| Protein, % of kcal/day                            | 16.5 (2.8)                          | 17.0 (2.9) | 16.7 (2.7) | 16.7 (2.7) | 0.64                 |
| Fat, % of kcal/day                                | 32.5 (6.3)                          | 32.1 (5.5) | 31.9 (5.1) | 35.1 (7.7) | 0.005                |
| Alcohol, g/day                                    | 6.9 (12.6)                          | 8.1 (9.0)  | 9.4 (9.8)  | 10.7 (9.5) | <0.001               |
| Caffeine, mg/day                                  | 119 (112)                           | 118 (102)  | 138 (114)  | 135 (105)  | 0.27                 |
| Multivitamin Use, n (%)                           | 80 (85.1)                           | 79 (88.8)  | 79 (87.8)  | 86 (86.9)  | 0.90                 |
| Duration of Use ≥2 years                          | 57 (71.3)                           | 61 (77.2)  | 54 (68.4)  | 64 (74.4)  | 0.62                 |

Abbreviations: FFQ; food frequency questionnaire; Q, quartile.

<sup>1</sup>P-values were calculated using a Kruskal-Wallis test for continuous variables and a chi-square test for categorical variables.

<sup>2</sup>Embryo transfer day and number were only assessed among fresh cycles with embryo transfer.

**Supplemental Table 4.** Baseline characteristics of 357 women (375 unique FFQs) by quartile of pre-treatment adherence to the Fertility Diet in the EARTH Study.

| Quartile (Range)                                  | Fertility Diet |            |            |             | p-value <sup>1</sup> |
|---------------------------------------------------|----------------|------------|------------|-------------|----------------------|
|                                                   | Q1 (13-22)     | Q2 (23-25) | Q3 (26-28) | Q4 (29-35)  |                      |
| Number of Women/FFQs                              | 99/100         | 93/98      | 89/95      | 76/82       |                      |
| <b>Personal Characteristics</b>                   |                |            |            |             |                      |
| Age, years                                        | 35.2 (4.2)     | 35.3 (4.0) | 35.6 (4.1) | 35.1 (3.8)  | 0.95                 |
| Ever smoker, n (%)                                | 21 (21.0)      | 30 (30.6)  | 23 (24.2)  | 26 (31.7)   | 0.29                 |
| White, n (%)                                      | 84 (84.0)      | 81 (82.7)  | 76 (80.0)  | 73 (89.0)   | 0.43                 |
| Education, n (%)                                  |                |            |            |             | 0.004                |
| High school or less                               | 17 (17.0)      | 6 (6.1)    | 4 (4.2)    | 2 (2.4)     |                      |
| College                                           | 32 (32.0)      | 30 (30.6)  | 38 (40.0)  | 29 (35.4)   |                      |
| Graduate school                                   | 51 (51.0)      | 62 (63.3)  | 53 (55.8)  | 51 (62.2)   |                      |
| BMI, kg/m <sup>2</sup>                            | 24.6 (4.9)     | 24.8 (4.3) | 23.6 (3.8) | 23.2 (3.6)  | 0.03                 |
| Moderate to vigorous exercise, hrs/wk             | 3.3 (3.7)      | 4.4 (4.4)  | 4.4 (5.0)  | 3.6 (3.9)   | 0.19                 |
| <b>Baseline Cycle Characteristics</b>             |                |            |            |             |                      |
| Infertility diagnosis, n (%)                      |                |            |            |             | 0.51                 |
| Female factor                                     | 27 (27.0)      | 38 (38.8)  | 29 (30.5)  | 23 (28.1)   |                      |
| Male factor                                       | 30 (30.0)      | 30 (30.6)  | 27 (28.4)  | 24 (29.3)   |                      |
| Unexplained                                       | 43 (43.0)      | 30 (30.6)  | 39 (41.1)  | 35 (42.7)   |                      |
| Treatment protocol, n (%)                         |                |            |            |             | 0.41                 |
| Antagonist                                        | 14 (14.0)      | 9 (9.2)    | 13 (13.7)  | 12 (14.6)   |                      |
| Flare                                             | 9 (9.0)        | 11 (11.2)  | 11 (11.6)  | 10 (12.2)   |                      |
| Luteal phase agonist                              | 70 (70.0)      | 62 (63.3)  | 65 (68.4)  | 54 (65.9)   |                      |
| Egg Donor or Cryo Cycle                           | 7 (7.0)        | 16 (16.3)  | 6 (6.3)    | 6 (7.3)     |                      |
| Day 3 FSH, IU/L                                   | 7.0 (1.7)      | 7.5 (2.8)  | 7.7 (3.3)  | 7.1 (1.8)   | 0.72                 |
| Embryo Transfer Day, n (%) <sup>2</sup>           |                |            |            |             | 0.14                 |
| Day 2                                             | 2 (2.4)        | 5 (6.8)    | 2 (2.7)    | 7 (10.3)    |                      |
| Day 3                                             | 36 (43.9)      | 41 (55.4)  | 35 (46.7)  | 33 (48.5)   |                      |
| Day 5                                             | 44 (53.7)      | 28 (37.8)  | 38 (50.7)  | 28 (41.2)   |                      |
| Number of Embryos Transferred, n (%) <sup>2</sup> |                |            |            |             | 0.75                 |
| 1 embryo                                          | 17 (20.7)      | 16 (21.9)  | 20 (26.7)  | 22 (32.4)   |                      |
| 2 embryos                                         | 48 (58.5)      | 44 (60.3)  | 42 (56.0)  | 35 (51.5)   |                      |
| 3+ embryos                                        | 17 (20.7)      | 13 (17.8)  | 13 (17.3)  | 11 (16.2)   |                      |
| <b>Dietary Characteristics</b>                    |                |            |            |             |                      |
| Total Calories, kcal/day                          | 1845 (571)     | 1872 (637) | 1740 (570) | 1714 (592)  | 0.13                 |
| Carbohydrates, % of kcal/day                      | 49.7 (7.8)     | 48.6 (7.2) | 49.9 (8.1) | 47.6 (7.9)  | 0.21                 |
| Protein, % of kcal/day                            | 17.2 (2.6)     | 17.0 (2.8) | 16.9 (3.1) | 15.7 (2.4)  | <0.001               |
| Fat, % of kcal/day                                | 31.6 (5.7)     | 32.9 (6.7) | 32.5 (6.3) | 35.1 (6.5)  | 0.008                |
| Alcohol, g/day                                    | 8.1 (11.5)     | 9.7 (11.3) | 7.3 (7.4)  | 10.3 (10.7) | 0.07                 |
| Caffeine, mg/day                                  | 142 (118)      | 131 (115)  | 106 (91.1) | 132 (104)   | 0.18                 |
| Multivitamin Use, n (%)                           | 59 (60.2)      | 93 (95.9)  | 93 (97.9)  | 79 (96.3)   | <0.001               |
| Duration of Use ≥2 years                          | 42 (71.2)      | 67 (72.0)  | 72 (77.4)  | 55 (69.6)   | 0.68                 |

Abbreviations: FFQ; food frequency questionnaire; Q, quartile.

<sup>1</sup>P-values were calculated using a Kruskal-Wallis test for continuous variables and a chi-square test for categorical variables.

<sup>2</sup>Embryo transfer day and number were only assessed among fresh cycles with embryo transfer.

**Supplemental Table 5.** Association between pre-treatment adherence to the Pro-Fertility Diet and probability of failing at various points during an ART cycle in the EARTH Study.

|                                      | <b>Adjusted Proportions (95% CI)<sup>1</sup></b> |                                                  |                                              |                                                     |
|--------------------------------------|--------------------------------------------------|--------------------------------------------------|----------------------------------------------|-----------------------------------------------------|
|                                      | Failing Prior to Embryo Transfer (n=608 cycles)  | Total Pregnancy Loss (n=343 cycles) <sup>2</sup> | Biochemical Loss (n=343 cycles) <sup>3</sup> | Clinical Pregnancy Loss (n=305 cycles) <sup>4</sup> |
| <b>Pro-Fertility Diet</b>            |                                                  |                                                  |                                              |                                                     |
| Q1 (11-20)                           | 0.13 (0.08, 0.19)                                | 0.28 (0.19, 0.39)                                | 0.12 (0.06, 0.22)                            | 0.18 (0.11, 0.28)                                   |
| Q2 (21-23)                           | 0.13 (0.08, 0.21)                                | 0.38 (0.29, 0.49)                                | 0.12 (0.07, 0.20)                            | 0.28 (0.19, 0.40)                                   |
| Q3 (24-25)                           | 0.06 (0.03, 0.12)                                | 0.26 (0.18, 0.36)                                | 0.09 (0.05, 0.17)                            | 0.18 (0.11, 0.28)                                   |
| Q4 (26-32)                           | 0.06 (0.03, 0.13)                                | 0.16 (0.10, 0.25)                                | 0.09 (0.05, 0.15)                            | 0.08 (0.04, 0.15)                                   |
| P for trend                          | 0.03                                             | 0.02                                             | 0.60                                         | 0.01                                                |
|                                      | <b>Adjusted Odds Ratio (95% CI)<sup>1</sup></b>  |                                                  |                                              |                                                     |
|                                      | Failing Prior to Embryo Transfer (n=608 cycles)  | Total Pregnancy Loss (n=343 cycles) <sup>2</sup> | Biochemical Loss (n=343 cycles) <sup>3</sup> | Clinical Pregnancy Loss (n=305 cycles) <sup>4</sup> |
| <b>Pro-Fertility Diet (per 1 SD)</b> | 0.75 (0.57, 0.98)                                | 0.74 (0.60, 0.92)                                | 0.90 (0.67, 1.19)                            | 0.69 (0.54, 0.90)                                   |

<sup>1</sup>Analyses were run using logistic regression models with generalized estimating equations. Data are presented as predicted marginal proportions (95% CI) or odds ratios (95% CI) adjusted for calorie intake, age, BMI, smoking status, and moderate to vigorous exercise.

<sup>2</sup>Defined as a positive beta-hCG that did not result in live birth.

<sup>3</sup>Defined as a positive beta-hCG that did result in clinical pregnancy.

<sup>4</sup>Defined as a clinical pregnancy that did not result in live birth.

**Supplemental Table 6.** Sensitivity analyses for the associations between pre-treatment adherence to various dietary patterns and probability of live birth following ART in the EARTH Study.

|                           | <b>Adjusted Proportion of Live Birth (95% CI)<sup>1</sup></b> |                                        |                                     |                                                     |                                                       |
|---------------------------|---------------------------------------------------------------|----------------------------------------|-------------------------------------|-----------------------------------------------------|-------------------------------------------------------|
|                           | Main Analysis<br>(n=608 cycles)                               | Only first ART cycle<br>(n=357 cycles) | Only fresh cycles<br>(n=473 cycles) | Only cycles within 1<br>yr of FFQ<br>(n=437 cycles) | Only cycles with<br>embryo transfer<br>(n=544 cycles) |
| <b>Pro-Fertility Diet</b> |                                                               |                                        |                                     |                                                     |                                                       |
| Q1 (11-20)                | 0.33 (0.26, 0.40)                                             | 0.34 (0.25, 0.44)                      | 0.34 (0.26, 0.42)                   | 0.29 (0.21, 0.38)                                   | 0.38 (0.30, 0.46)                                     |
| Q2 (21-23)                | 0.32 (0.25, 0.40)                                             | 0.37 (0.27, 0.47)                      | 0.37 (0.28, 0.46)                   | 0.32 (0.24, 0.42)                                   | 0.38 (0.30, 0.47)                                     |
| Q3 (24-25)                | 0.48 (0.39, 0.57)*                                            | 0.51 (0.40, 0.62)*                     | 0.49 (0.39, 0.60)*                  | 0.49 (0.38, 0.60)                                   | 0.52 (0.42, 0.61)*                                    |
| Q4 (26-32)                | 0.56 (0.47, 0.64)*                                            | 0.56 (0.45, 0.67)*                     | 0.55 (0.45, 0.65)*                  | 0.56 (0.45, 0.66)                                   | 0.60 (0.51, 0.69)*                                    |
| P for trend               | <0.001                                                        | <0.001                                 | 0.002                               | <0.001                                              | <0.001                                                |
| <b>MedDiet</b>            |                                                               |                                        |                                     |                                                     |                                                       |
| Q1 (17-28)                | 0.31 (0.25, 0.39)                                             | 0.35 (0.25, 0.46)                      | 0.35 (0.27, 0.44)                   | 0.31 (0.22, 0.42)                                   | 0.35 (0.27, 0.43)                                     |
| Q2 (29-31)                | 0.47 (0.39, 0.55)*                                            | 0.52 (0.42, 0.62)*                     | 0.50 (0.41, 0.60)*                  | 0.47 (0.37, 0.57)*                                  | 0.55 (0.46, 0.64)*                                    |
| Q3 (32-33)                | 0.44 (0.36, 0.53)*                                            | 0.42 (0.31, 0.54)                      | 0.41 (0.32, 0.52)                   | 0.41 (0.31, 0.52)                                   | 0.48 (0.39, 0.57)*                                    |
| Q4 (34-44)                | 0.41 (0.34, 0.49)                                             | 0.45 (0.35, 0.55)                      | 0.44 (0.35, 0.53)                   | 0.40 (0.31, 0.50)                                   | 0.47 (0.39, 0.56)*                                    |
| P for trend               | 0.06                                                          | 0.31                                   | 0.26                                | 0.25                                                | 0.05                                                  |
| <b>aHEI2010</b>           |                                                               |                                        |                                     |                                                     |                                                       |
| Q1 (32-60)                | 0.44 (0.36, 0.52)                                             | 0.51 (0.41, 0.61)                      | 0.44 (0.36, 0.54)                   | 0.49 (0.38, 0.60)                                   | 0.48 (0.40, 0.57)                                     |
| Q2 (61-67)                | 0.42 (0.34, 0.50)                                             | 0.47 (0.37, 0.58)                      | 0.47 (0.38, 0.57)                   | 0.39 (0.29, 0.49)                                   | 0.47 (0.38, 0.55)                                     |
| Q3 (68-74)                | 0.40 (0.33, 0.49)                                             | 0.35 (0.25, 0.46)*                     | 0.39 (0.30, 0.49)                   | 0.35 (0.26, 0.46)                                   | 0.47 (0.38, 0.56)                                     |
| Q4 (75-99)                | 0.37 (0.29, 0.45)                                             | 0.41 (0.31, 0.51)                      | 0.40 (0.31, 0.50)                   | 0.38 (0.30, 0.48)                                   | 0.42 (0.34, 0.51)                                     |
| P for trend               | 0.19                                                          | 0.07                                   | 0.34                                | 0.15                                                | 0.41                                                  |
| <b>Fertility Diet</b>     |                                                               |                                        |                                     |                                                     |                                                       |
| Q1 (13-22)                | 0.37 (0.30, 0.45)                                             | 0.41 (0.32, 0.52)                      | 0.39 (0.31, 0.48)                   | 0.37 (0.28, 0.47)                                   | 0.42 (0.34, 0.51)                                     |
| Q2 (23-25)                | 0.42 (0.35, 0.50)                                             | 0.45 (0.35, 0.56)                      | 0.42 (0.33, 0.51)                   | 0.39 (0.30, 0.49)                                   | 0.47 (0.38, 0.55)                                     |
| Q3 (26-28)                | 0.42 (0.34, 0.50)                                             | 0.43 (0.33, 0.53)                      | 0.44 (0.35, 0.54)                   | 0.40 (0.30, 0.50)                                   | 0.48 (0.39, 0.57)                                     |
| Q4 (29-35)                | 0.43 (0.34, 0.52)                                             | 0.46 (0.34, 0.57)                      | 0.46 (0.36, 0.56)                   | 0.46 (0.35, 0.57)                                   | 0.48 (0.38, 0.58)                                     |
| P for trend               | 0.37                                                          | 0.67                                   | 0.25                                | 0.25                                                | 0.37                                                  |

Abbreviations: aHEI2010, alternate Healthy Eating Index 2010; FFQ, food frequency questionnaire; MedDiet, Mediterranean Diet;

<sup>1</sup>Analyses used generalized linear mixed models with random intercepts, binomial distribution, and logit link. Data are presented as predicted marginal proportions (95% CI) adjusted for calorie intake, age, BMI, smoking status, and moderate to vigorous exercise.

\*P-value < 0.05 for comparison of specific quartile versus quartile 1 (reference).

**Supplemental Figure 1.** Overview of the 605 initiated ART cycles included in the analysis of pre-conception dietary patterns and ART outcomes in EARTH.

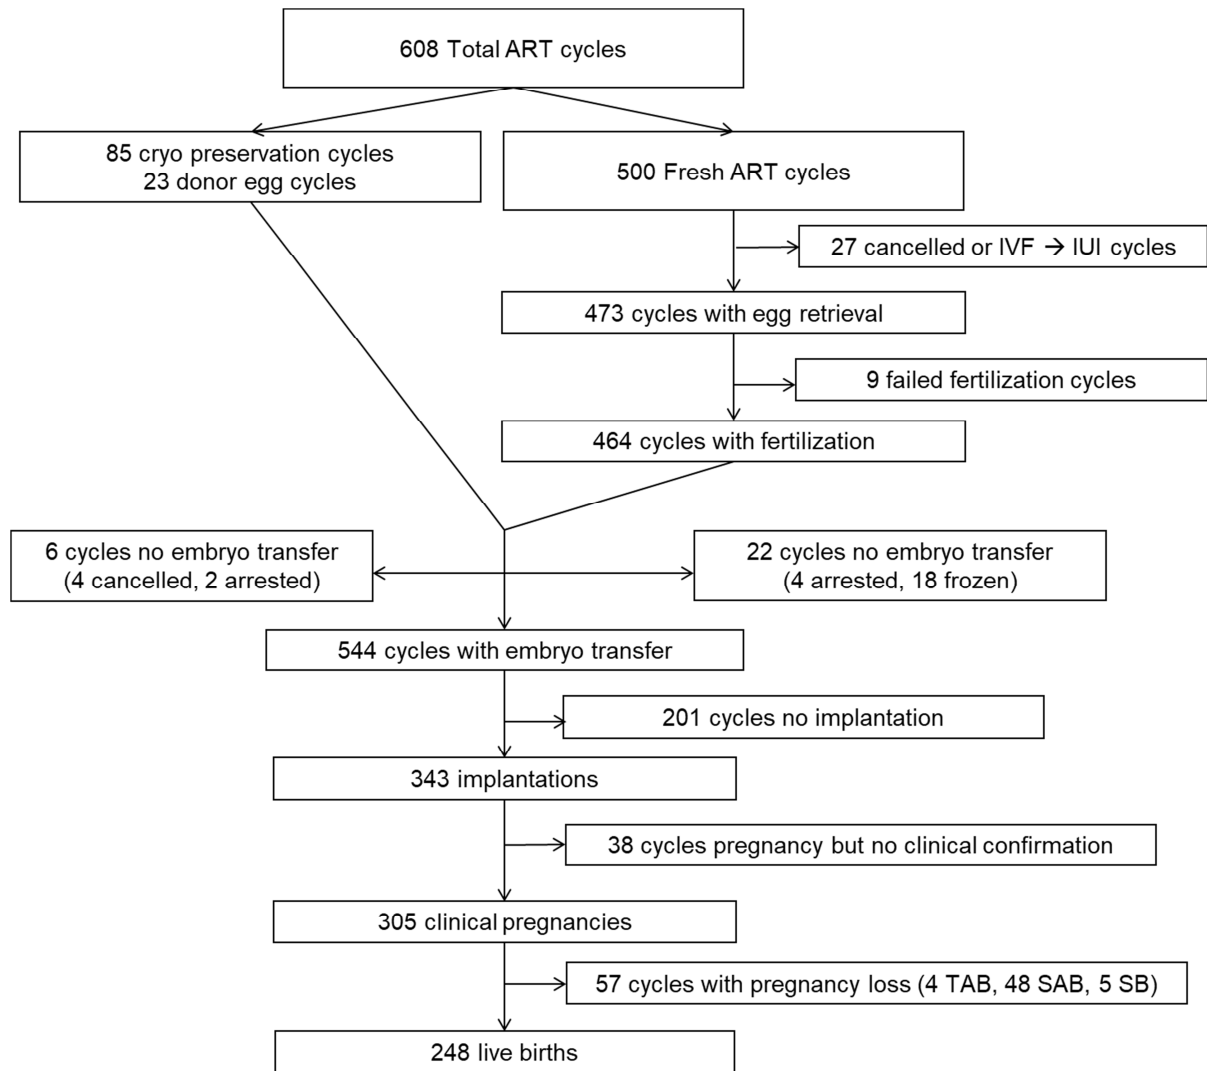

Abbreviations: ART, assisted reproductive technology; IUI, intrauterine insemination; SAB, spontaneous abortion; SB, stillbirth; TAB, therapeutic abortion.

**Supplemental Figure 2.** Association between pre-treatment adherence to components of the Pro-Fertility Diet and odds of live birth following ART in the EARTH Study.

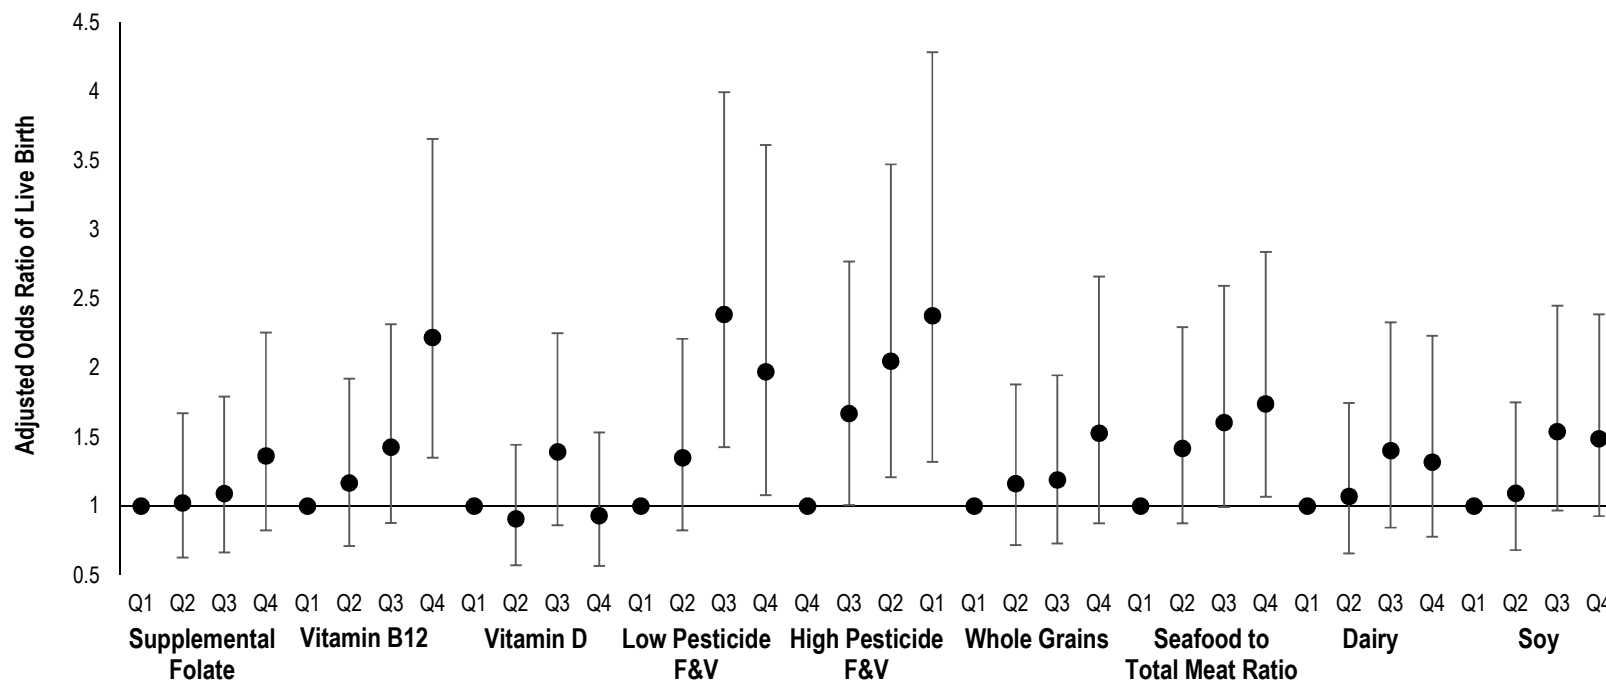

Analyses were run using generalized linear mixed models with random intercepts, binomial distribution, and logit link function adjusted for calorie intake, age, BMI, smoking status, and moderate to vigorous exercise. Each component was analyzed separately, not adjusting for the other components, with the exception of high and low pesticide fruits and vegetables. Abbreviations: F&V, fruits and vegetables.
